# Supplementary material for: Melamine-Derived Mesoporous Carbon for Efficient and Selective Removal of Trace Hg(II) from Honeysuckle Decoction
Source: PubMed Central journal article supplement — ACS Omega. 2024 Nov 1;9(45):44931–41. doi: 10.1021/acsomega.4c03269 (PMC11561613; doi:10.1021/acsomega.4c03269), 2024-11-01
Supplement: ao4c03269_si_001.pdf [file ao4c03269_si_001.pdf]

Supplementary materials for:

## Melamine-derived mesoporous carbon for efficient and selective removal of trace Hg(II) from honeysuckle decoction

Qing He<sup>1</sup>, Kun Pang<sup>1</sup>, Lin Tian<sup>1</sup>, Yiqian Ma<sup>2</sup>, Xiang Guo<sup>1</sup>, Jianyong Zhang<sup>1\*</sup>, Ming Yu<sup>1,3\*</sup>

<sup>1</sup>School of Pharmacy, Zunyi Medical University, Zunyi 563000, China

<sup>2</sup>Guizhou Institute of Products Quality Inspection & Testing, Guiyang, 550025, China

<sup>3</sup>State Key Laboratory of Natural and Biomimetic Drugs, School of Pharmaceutical Sciences, Peking University, Beijing, 100191, China

<sup>a</sup>Email: [1473686825@qq.com](mailto:1473686825@qq.com), <sup>b</sup>Email: [2651557529@qq.com](mailto:2651557529@qq.com),

<sup>c</sup>Email: [2631475620@qq.com](mailto:2631475620@qq.com), <sup>d</sup>Email: [326668213@qq.com](mailto:326668213@qq.com), <sup>e</sup>Email: [2631475620@qq.com](mailto:2631475620@qq.com), <sup>f</sup>Email: [zhangjianyong2006@126.com](mailto:zhangjianyong2006@126.com),

<sup>g</sup>Email: [Cosmosym920@163.com](mailto:Cosmosym920@163.com) (crossponding author email address)

### 1. Schematic diagram

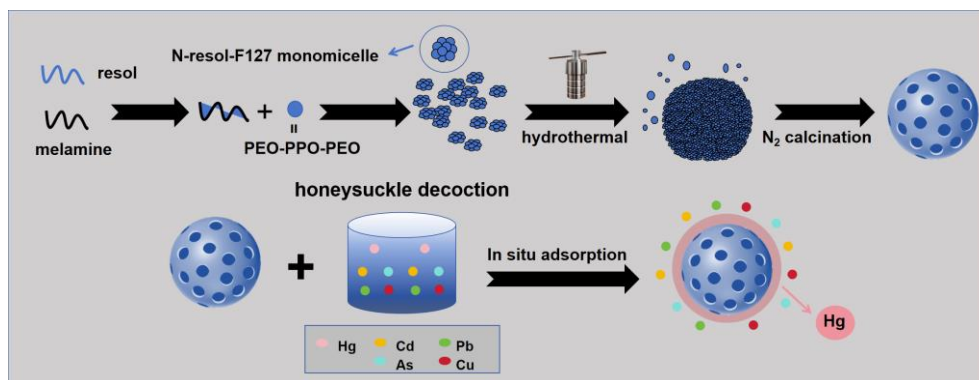

Fig.S1 Schematic diagram of synthesis and adsorption

### 2. Selective adsorption study

The results of MCN<sub>1</sub>, MCN<sub>2</sub>, MCN<sub>3</sub>, and MCN<sub>4</sub> on the removal of Pb(II), As(II), Cd(II), Hg(II), and Cu(II) in Table S1. The best adsorption effect of MCNs is at 20 mg·L<sup>-1</sup> Hg(II) concentrations (pH = 6.0). As can be seen from the Table S1, among Pb(II), As(II), Cd(II), Hg(II), and Cu(II), MCNs show

certain selective removal performance of Hg(II), and the selectivity rate for Hg(II) by MCN<sub>1</sub> is 92.18%.

Table S1 Selective removal rate of five heavy metals by mesoporous carbon materials

| Removal (%)      | Pb    | Hg     | As    | Cd    | Cu    |
|------------------|-------|--------|-------|-------|-------|
| MCN <sub>1</sub> | 0%    | 92.18% | 0%    | 0%    | 0%    |
| MCN <sub>2</sub> | 2.63% | 62.08% | 2.77% | 1.05% | 1.96% |
| MCN <sub>3</sub> | 0%    | 30.97% | 0.85% | 0%    | 0.16% |
| MCN <sub>4</sub> | 3.06% | 68.61% | 0%    | 0%    | 3.72% |

### 3. Dosage effects on adsorption

Fig. S1 shows the adsorbent dose influence on Hg(II) removal rate. The removal efficiencies of the MCN<sub>1</sub>, MCN<sub>2</sub>, MCN<sub>3</sub>, and MCN<sub>4</sub> increased from the initial dose of 5 mg/20 mL to 20 mg/20 mL (10 mg·L<sup>-1</sup> Hg(II)), 24 h of the adsorption time, and 30 °C of the temperature).

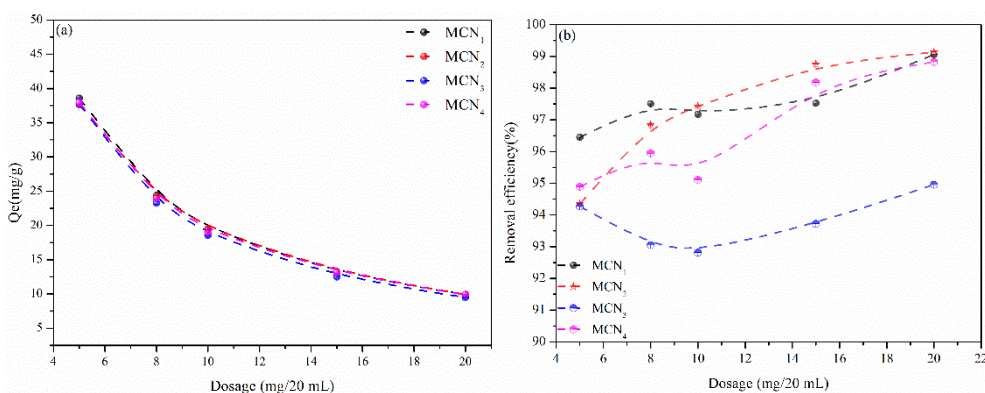

Fig.S2 Removal efficiency and adsorption of Hg(II) by the dosing amount of MCNs (a) and (b)

### 4. Effects of initial concentration on adsorption

The effect of different initial concentration on the Hg(II) adsorption is presented in Fig. S2 (5 mg of adsorbent amount, Hg(II) initial concentration of two gradients. Gradients 1 is 0.0005 mg/L, 0.001 mg/L, 0.002mg/L, 0.004 mg/L, 0.006 mg/L, 0.008 mg/L, and 0.01mg/L. Gradients 2 is 0.01 mg/L, 0.13 mg/L, 0.16mg/L, 0.19 mg/L, 0.22 mg/L, 0.3 mg/L, 0.4mg/L.

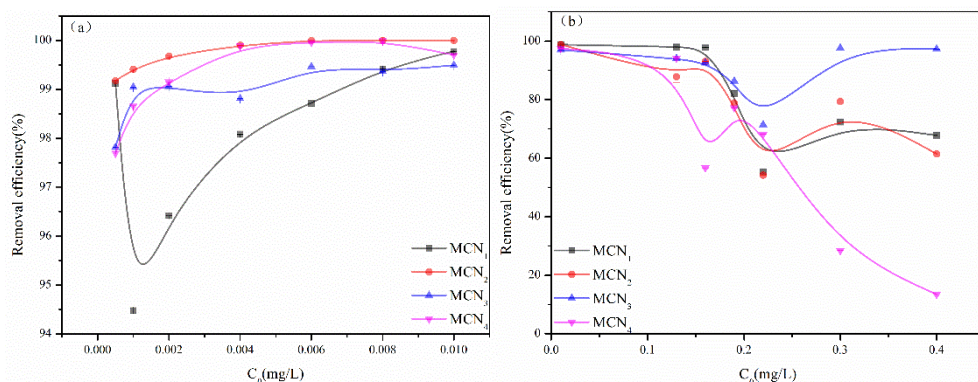

Fig.S3 Plots of the removal rate (%) of mesoporous carbon for different concentrations of Hg(II), (a)Gradient 1, (b)Gradient 2

### 5. Effects of adsorption time on on adsorption

The adsorption time is one of the main factors to measure the adsorption efficiency. The experimental conditions are as follows:  $0.13 \text{ mg} \cdot \text{L}^{-1}$  of Mercury ion concentration, 30 min, 60 min, 90 min, 120 min, 180 min, 240 min, 420 min, 600 min and 960 min of adsorption times.

Table S2 Kinetic parameters of the pseudo-second-order and the pseudo-first-order models of MCNs for Hg(II)

| Kinetic models   | $q_{e,exp}$<br>(mg/g) | Pseudo-first-order |         |        | Pseudo-second-order |              |         |
|------------------|-----------------------|--------------------|---------|--------|---------------------|--------------|---------|
|                  |                       | $q_e$              | $K_1$   | $R^2$  | $q_e$               | $K_2$        | $R^2$   |
|                  |                       | (mg/g)             | (1/min) |        | (mg/g)              | (g/(mg·min)) |         |
| MCN <sub>1</sub> | 0.5094                | 0.0023             | 6.058   | 0.1599 | 0.5088              | 0.3034       | 0.99999 |
| MCN <sub>2</sub> | 0.5169                | 0.0163             | 4.1168  | 0.0672 | 0.5052              | 0.3499       | 0.99999 |
| MCN <sub>3</sub> | 0.4730                | 0.0363             | 3.3159  | 0.7493 | 0.4749              | 9.0147       | 0.99996 |
| MCN <sub>4</sub> | 0.5002                | 0.0046             | 5.37612 | 0.1473 | 0.4907              | -2.3255      | 0.99976 |

### 6. Effects of adsorption temperature on adsorption

This work is designed to 5 mg of MCN<sub>X</sub> to 20 mL of different concentrations ( $0.01 \text{ mg} \cdot \text{L}^{-1}$ ,  $0.13 \text{ mg} \cdot \text{L}^{-1}$ ,  $0.16 \text{ mg} \cdot \text{L}^{-1}$ ,  $0.19 \text{ mg} \cdot \text{L}^{-1}$ ,  $0.22 \text{ mg} \cdot \text{L}^{-1}$ ,  $0.30 \text{ mg} \cdot \text{L}^{-1}$ , and  $0.40 \text{ mg} \cdot \text{L}^{-1}$ ) in Hg(II) for adsorption experiments. The results are shown in Fig.S3.

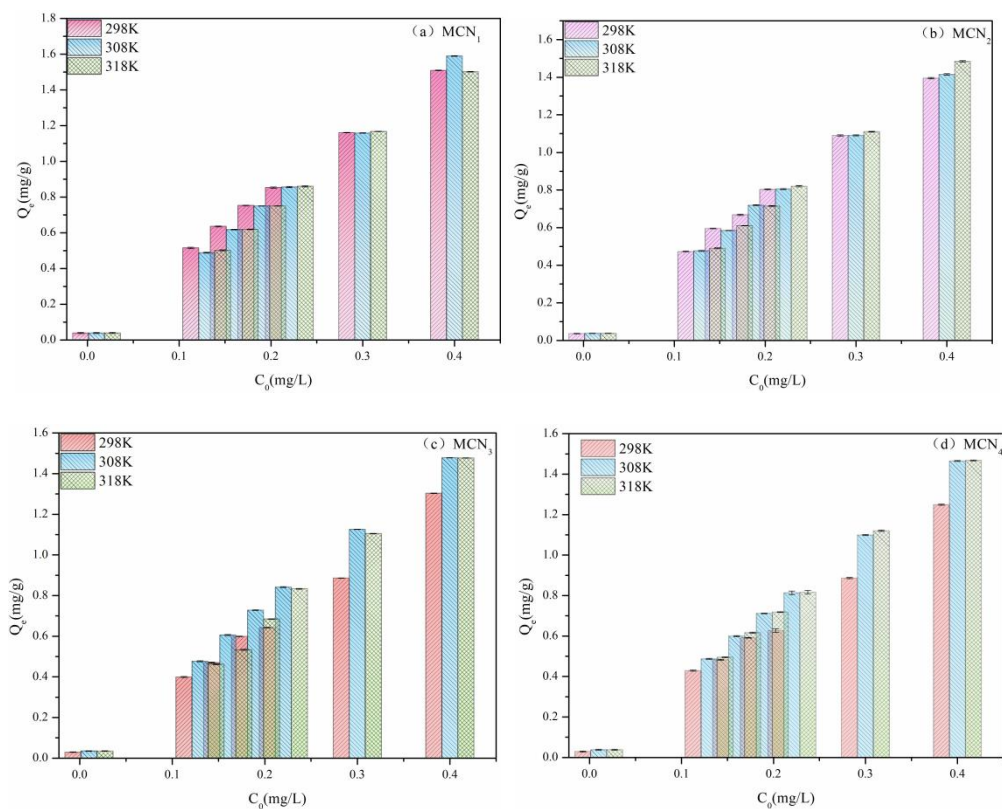

Fig.S4 The removal rate of Hg(II) at different temperatures: (a)MCN<sub>1</sub>, (b) MCN<sub>2</sub>, (c) MCN<sub>3</sub>, (d) MCN<sub>4</sub>

## 7. The effect of pH on the stability of the solution

This work designed Hg(II) adsorption experiments using 5 mg of MCN<sub>1</sub> in 20 mL of honeysuckle extract at different pH levels (2, 4, 5, 6, 7, 8, 9). The results are shown in Figure S4.

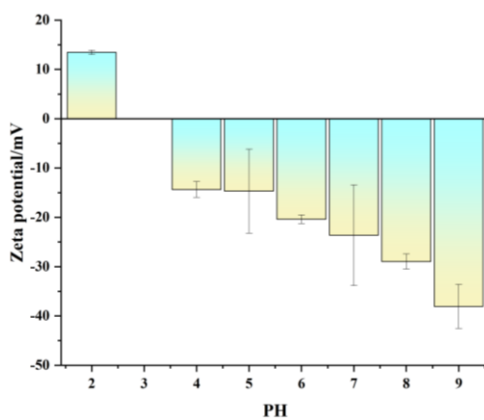

Fig.S5 PH influence on zeta potential: MCN<sub>1</sub>
